# Supplementary material
Source: PubMed Central journal article supplement (PMC4551183)
Supplement: AEM.00524-15_zam999116405so1.pdf [file AEM.00524-15_zam999116405so1.pdf]

**Table S1. Basic genome statistics for the *Giardia* samples sequenced in this study from Creston, BC. H=human, W=water, B=beaver. \*Sample VANC/90/UBC/45 has bacterial contamination and the largest contig corresponds to *Clostridium* spp. The largest contig corresponding for *Giardia* sp. is 260,011 bp.**

| Sample ID        | Source | Genome size | GC (%) | # contigs (> 1 kb) | Largest contigs | N50    | Reads aligned | Fold Coverage | Rate of alignment (Bowtie2) |          |          |
|------------------|--------|-------------|--------|--------------------|-----------------|--------|---------------|---------------|-----------------------------|----------|----------|
|                  |        |             |        |                    |                 |        |               |               | WB (A1)                     | DHA (A2) | GS_B (B) |
| VANC/90/UBC/ 41  | H      | 11,625,828  | 47.99  | 641                | 260,011         | 51,753 | 2,564,933     | 88.33         | 0.99%                       | 0.93%    | 91.24%   |
| VANC/90/UBC/ 42  | H      | 11,138,540  | 49.24  | 713                | 168,072         | 52,859 | 3,153,295     | 138.16        | 92.93%                      | 96.67%   | 1.02%    |
| VANC/90/UBC/ 43  | H      | 10,773,986  | 48.89  | 507                | 191,820         | 57,584 | 2,459,041     | 101.63        | 99.22%                      | 92.91%   | 0.54%    |
| VANC/90/UBC/ 45* | H      | 13,523,024  | 48.21  | 579                | 1,388,027       | 66,812 | 5,871,828     | 80.56         | 0.48%                       | 0.46%    | 41.84%   |
| VANC/90/UBC/ 46  | H      | 11,473,860  | 47.95  | 603                | 261,363         | 53,309 | 1,752,804     | 43.52         | 1.15%                       | 1.10%    | 87.44%   |
| VANC/90/UBC/49   | W      | 11,975,651  | 47.94  | 924                | 139,974         | 44,592 | 3,509,694     | 86.21         | 1.05%                       | 0.99%    | 86.83%   |
| VANC/90/UBC/50   | W      | 11,458,722  | 47.99  | 588                | 260,290         | 54,278 | 2,254,481     | 57.78         | 1.22%                       | 1.15%    | 85.83%   |
| VANC/90/UBC/52   | B      | 10,950,575  | 48.98  | 577                | 148,917         | 59,116 | 3,316,403     | 95.77         | 99.08%                      | 91.72%   | 0.72%    |
| VANC/90/UBC/ 71  | H      | 10,802,051  | 48.91  | 526                | 246,364         | 57,191 | 1,646,856     | 56.24         | 97.58%                      | 92.50%   | 0.57%    |
| VANC/90/UBC/ 40  | W      | 11,472,656  | 47.92  | 691                | 262,713         | 60,043 | 3,026,736     | 119.72        | 0.71%                       | 0.68%    | 93.27%   |
| VANC/90/UBC/ 44  | H      | 11,487,245  | 47.97  | 686                | 258,661         | 57,567 | 3,224,387     | 125.50        | 0.78%                       | 0.74%    | 92.60%   |
| VANC/90/UBC/ 60  | H      | 11,352,332  | 47.78  | 693                | 261,166         | 56,348 | 839,242       | 33.00         | 0.62%                       | 0.59%    | 91.68%   |
